# Supplementary material for: K8Nb7P7O39: a new type of complicated incommensurately modulated structure and photoluminescence properties of Eu3+-doped solid solutions
Source: Royal Society of Chemistry journal article supplement (doi:10.1039/c6tc03022j), 2016-01-01
Supplement: c6tc03022j1.pdf [file c6tc03022j1.pdf]

## Supporting Information

Table S1. Fractional atomic coordinates and isotropic or equivalent isotropic displacement parameters ( $\text{\AA}^2$ ) of the average structure of  $\text{K}_8\text{Nb}_7\text{P}_7\text{O}_{39}$ .

|                 | <i>x</i>     | <i>y</i>     | <i>z</i>      | $U_{\text{iso}}^*/U_{\text{eq}}$ | Occ. (<1) |
|-----------------|--------------|--------------|---------------|----------------------------------|-----------|
| Nb <sup>1</sup> | 0.77440 (4)  | 0.11937 (3)  | 0.070615 (19) | 0.00819 (11)                     |           |
| Nb <sup>2</sup> | 0.98212 (4)  | 0.73136 (3)  | 0.30766 (2)   | 0.00864 (12)                     |           |
| Nb <sup>3</sup> | 0.88437 (4)  | 0.23012 (3)  | 0.30595 (2)   | 0.00898 (12)                     |           |
| Nb <sup>4</sup> | 0.47911 (4)  | 1.10697 (3)  | 0.31043 (2)   | 0.00854 (12)                     |           |
| Nb <sup>5</sup> | 1.38231 (4)  | 0.60709 (3)  | 0.30969 (2)   | 0.01040 (12)                     |           |
| Nb <sup>6</sup> | 1.16398 (4)  | 0.19558 (3)  | 0.01483 (2)   | 0.00897 (12)                     |           |
| Nb <sup>7</sup> | 1.29228 (4)  | 0.50993 (3)  | 0.07820 (2)   | 0.01189 (12)                     |           |
| K <sup>1</sup>  | 0.50693 (11) | 0.32371 (8)  | 0.18916 (6)   | 0.0198 (3)                       |           |
| K <sup>2</sup>  | 0.24869 (15) | 0.24917 (9)  | 0.49368 (6)   | 0.0306 (4)                       |           |
| K <sup>3</sup>  | 0.74701 (13) | 0.91212 (11) | 0.18076 (6)   | 0.0295 (4)                       |           |
| K <sup>4</sup>  | 0.97960 (15) | 0.41130 (9)  | 0.17534 (7)   | 0.0298 (4)                       |           |
| K <sup>5</sup>  | 0.26232 (15) | 0.82295 (9)  | 0.17160 (8)   | 0.0366 (4)                       |           |
| P <sup>1</sup>  | 0.62053 (12) | 0.84906 (9)  | 0.33361 (7)   | 0.0132 (3)                       |           |
| P <sup>2</sup>  | 1.10802 (12) | 0.00474 (9)  | 0.32137 (7)   | 0.0152 (3)                       |           |
| P <sup>3</sup>  | 0.59834 (11) | -0.04022 (8) | -0.10333 (6)  | 0.0083 (3)                       |           |
| P <sup>4</sup>  | 0.76412 (12) | 0.50742 (9)  | 0.33212 (7)   | 0.0138 (3)                       |           |
| P <sup>5</sup>  | 1.07298 (13) | 0.36514 (9)  | -0.09748 (6)  | 0.0122 (3)                       |           |
| P <sup>6</sup>  | 1.25752 (12) | 0.34431 (9)  | 0.32084 (7)   | 0.0123 (3)                       |           |
| P <sup>7</sup>  | 0.53895 (11) | 0.31438 (8)  | 0.00688 (6)   | 0.0079 (3)                       |           |
| O <sup>1</sup>  | 1.3727 (3)   | 0.2491 (2)   | 0.29307 (18)  | 0.0160 (10)                      |           |
| O <sup>2</sup>  | 1.0906 (4)   | 0.5899 (3)   | 0.08726 (19)  | 0.0225 (11)                      |           |
| O <sup>3</sup>  | 0.4910 (3)   | 0.4305 (2)   | 0.05789 (16)  | 0.0117 (9)                       |           |
| O <sup>4</sup>  | 0.2596 (4)   | 1.0267 (3)   | 0.2919 (3)    | 0.0357 (15)                      |           |
| O <sup>5</sup>  | 0.8347 (3)   | 0.1780 (2)   | 0.17016 (17)  | 0.0132 (9)                       |           |
| O <sup>6</sup>  | 1.2814 (4)   | 0.3884 (3)   | 0.4053 (2)    | 0.0254 (12)                      |           |
| O <sup>7</sup>  | 0.6857 (3)   | 0.0705 (2)   | -0.04996 (16) | 0.0115 (9)                       |           |
| O <sup>8</sup>  | 0.9749 (3)   | 0.0717 (3)   | 0.28697 (18)  | 0.0175 (10)                      |           |
| O <sup>9</sup>  | 0.5608 (3)   | 0.0639 (3)   | 0.08201 (18)  | 0.0171 (10)                      |           |
| O <sup>10</sup> | 0.7866 (3)   | 0.3791 (2)   | 0.29006 (17)  | 0.0145 (9)                       |           |
| O <sup>11</sup> | 1.2889 (3)   | 0.4415 (2)   | 0.28266 (17)  | 0.0144 (9)                       |           |
| O <sup>12</sup> | 1.0918 (4)   | 0.3426 (3)   | -0.17959 (18) | 0.0239 (11)                      |           |
| O <sup>13</sup> | 0.6090 (3)   | 0.3413 (2)   | -0.05798 (16) | 0.0120 (9)                       |           |
| O <sup>14</sup> | 1.1750 (3)   | 0.6595 (3)   | 0.2873 (2)    | 0.0199 (11)                      |           |
| O <sup>15</sup> | 0.6744 (3)   | 0.1640 (2)   | 0.29107 (19)  | 0.0172 (10)                      |           |
| O <sup>16</sup> | 0.9346 (4)   | 0.2730 (3)   | 0.40406 (19)  | 0.0240 (11)                      |           |
| O <sup>17</sup> | 1.3588 (4)   | 0.5573 (3)   | 0.17793 (17)  | 0.0164 (9)                       |           |
| O <sup>18</sup> | 1.0736 (3)   | 0.2463 (2)   | -0.07838 (16) | 0.0143 (9)                       |           |

|                 |             |             |               |             |        |
|-----------------|-------------|-------------|---------------|-------------|--------|
| O <sup>19</sup> | 0.5673 (3)  | 0.9460 (2)  | 0.29647 (18)  | 0.0160 (9)  |        |
| O <sup>20</sup> | 0.8818 (4)  | 0.5772 (3)  | 0.3039 (2)    | 0.0243 (12) |        |
| O <sup>21</sup> | 0.9745 (3)  | 0.1785 (2)  | 0.04426 (17)  | 0.0138 (9)  |        |
| O <sup>22</sup> | 0.7919 (4)  | 0.5336 (3)  | 0.4167 (2)    | 0.0259 (11) |        |
| O <sup>23</sup> | 0.5106 (4)  | 1.1501 (3)  | 0.40988 (19)  | 0.0298 (13) |        |
| O <sup>24</sup> | 1.2025 (3)  | 0.3583 (2)  | 0.07441 (16)  | 0.0108 (8)  |        |
| O <sup>25</sup> | 0.8366 (3)  | -0.0378 (2) | 0.05439 (15)  | 0.0112 (8)  |        |
| O <sup>26</sup> | 0.7599 (3)  | 0.7960 (3)  | 0.29660 (19)  | 0.0191 (10) |        |
| O <sup>27</sup> | 0.5949 (3)  | 0.5331 (3)  | 0.2975 (2)    | 0.0228 (11) |        |
| O <sup>28</sup> | 0.5706 (4)  | -0.0328 (3) | -0.18420 (17) | 0.0175 (10) |        |
| O <sup>29</sup> | 0.6695 (3)  | 0.2711 (2)  | 0.05942 (16)  | 0.0130 (9)  |        |
| O <sup>30</sup> | 0.3950 (3)  | 0.2286 (2)  | -0.02315 (17) | 0.0132 (9)  |        |
| O <sup>31</sup> | 1.4800 (4)  | 0.7565 (3)  | 0.3034 (2)    | 0.0316 (14) |        |
| O <sup>32</sup> | 1.1990 (4)  | 0.4529 (2)  | -0.04390 (17) | 0.0158 (9)  |        |
| O <sup>33</sup> | 1.1331 (5)  | 0.0339 (3)  | 0.4053 (2)    | 0.0328 (13) |        |
| O <sup>34</sup> | 1.3025 (3)  | 0.1473 (2)  | 0.09709 (16)  | 0.0122 (9)  |        |
| O <sup>35</sup> | 0.6560 (4)  | 0.8896 (3)  | 0.4181 (2)    | 0.0282 (12) |        |
| O <sup>36</sup> | 1.4092 (5)  | 0.6416 (3)  | 0.4087 (2)    | 0.0318 (13) |        |
| O <sup>37</sup> | 1.0871 (3)  | 0.2950 (3)  | 0.2837 (2)    | 0.0210 (11) |        |
| O <sup>38</sup> | 1.0546 (3)  | 0.8737 (2)  | 0.28033 (18)  | 0.0167 (10) |        |
| O <sup>39</sup> | 1.0291 (4)  | 0.7810 (3)  | 0.40641 (19)  | 0.0270 (12) |        |
| K <sup>6</sup>  | 0           | 0           | 0.5           | 0.0785 (16) | 0.7312 |
| K <sup>7</sup>  | 0.1802 (4)  | -0.0795 (3) | 0.52932 (18)  | 0.0165 (10) | 0.2688 |
| K <sup>8</sup>  | 0.6377 (2)  | 0.0977 (2)  | 0.53762 (11)  | 0.0530 (8)  | 0.7312 |
| K <sup>9</sup>  | 0.5         | 0.5         | 0.5           | 0.139 (3)   | 0.7609 |
| K <sup>10</sup> | 0.6646 (9)  | 0.3950 (4)  | 0.4741 (3)    | 0.055 (2)   | 0.2391 |
| K <sup>11</sup> | 0.8820 (2)  | 0.4220 (2)  | 0.53503 (11)  | 0.0553 (8)  | 0.7609 |
| K <sup>12</sup> | -0.3652 (3) | -0.3851 (3) | 0.16563 (17)  | 0.0078 (9)  | 0.254  |

Table S2. Atomic displacement parameters ( $\text{\AA}^2$ ) of the average structure of  $\text{K}_8\text{Nb}_7\text{P}_7\text{O}_{39}$

|                 | $U^{11}$     | $U^{22}$     | $U^{33}$     | $U^{12}$     | $U^{13}$     | $U^{23}$     |
|-----------------|--------------|--------------|--------------|--------------|--------------|--------------|
| Nb <sup>1</sup> | 0.00765 (17) | 0.00901 (18) | 0.00790 (18) | 0.00142 (13) | 0.00173 (13) | 0.00216 (13) |
| Nb <sup>2</sup> | 0.00798 (18) | 0.00667 (18) | 0.01250 (19) | 0.00100 (12) | 0.00266 (13) | 0.00420 (13) |
| Nb <sup>3</sup> | 0.00659 (18) | 0.00753 (18) | 0.01436 (19) | 0.00076 (12) | 0.00241 (13) | 0.00529 (14) |
| Nb <sup>4</sup> | 0.00711 (18) | 0.00701 (18) | 0.01328 (19) | 0.00120 (12) | 0.00343 (13) | 0.00481 (13) |
| Nb <sup>5</sup> | 0.00948 (18) | 0.00679 (18) | 0.0170 (2)   | 0.00147 (13) | 0.00625 (14) | 0.00452 (14) |
| Nb <sup>6</sup> | 0.00733 (17) | 0.00936 (18) | 0.01247 (19) | 0.00178 (12) | 0.00263 (13) | 0.00621 (13) |
| Nb <sup>7</sup> | 0.0200 (2)   | 0.00792 (18) | 0.01097 (19) | 0.00612 (14) | 0.00792 (14) | 0.00465 (14) |
| K <sup>1</sup>  | 0.0203 (5)   | 0.0198 (5)   | 0.0170 (4)   | -0.0004 (4)  | 0.0033 (4)   | 0.0015 (4)   |
| K <sup>2</sup>  | 0.0537 (7)   | 0.0158 (5)   | 0.0223 (5)   | 0.0047 (4)   | 0.0030 (5)   | 0.0075 (4)   |
| K <sup>3</sup>  | 0.0312 (6)   | 0.0433 (6)   | 0.0193 (5)   | 0.0139 (5)   | 0.0103 (4)   | 0.0135 (5)   |
| K <sup>4</sup>  | 0.0431 (6)   | 0.0201 (5)   | 0.0339 (6)   | 0.0052 (4)   | 0.0183 (5)   | 0.0135 (4)   |
| K <sup>5</sup>  | 0.0392 (7)   | 0.0182 (5)   | 0.0516 (8)   | -0.0063 (4)  | 0.0281 (6)   | -0.0032 (5)  |

|                 |             |             |             |              |              |              |
|-----------------|-------------|-------------|-------------|--------------|--------------|--------------|
| P <sup>1</sup>  | 0.0097 (5)  | 0.0104 (5)  | 0.0247 (6)  | 0.0030 (4)   | 0.0062 (4)   | 0.0114 (4)   |
| P <sup>2</sup>  | 0.0086 (4)  | 0.0077 (5)  | 0.0315 (6)  | 0.0005 (3)   | 0.0015 (4)   | 0.0105 (4)   |
| P <sup>3</sup>  | 0.0082 (4)  | 0.0078 (4)  | 0.0092 (4)  | 0.0005 (3)   | 0.0006 (3)   | 0.0035 (3)   |
| P <sup>4</sup>  | 0.0098 (5)  | 0.0065 (4)  | 0.0254 (6)  | 0.0010 (3)   | 0.0047 (4)   | 0.0041 (4)   |
| P <sup>5</sup>  | 0.0194 (5)  | 0.0097 (5)  | 0.0080 (5)  | 0.0066 (4)   | 0.0025 (4)   | 0.0030 (4)   |
| P <sup>6</sup>  | 0.0097 (4)  | 0.0086 (4)  | 0.0234 (6)  | 0.0021 (3)   | 0.0072 (4)   | 0.0097 (4)   |
| P <sup>7</sup>  | 0.0079 (4)  | 0.0061 (4)  | 0.0114 (5)  | 0.0013 (3)   | 0.0038 (3)   | 0.0039 (3)   |
| O <sup>1</sup>  | 0.0112 (13) | 0.0126 (14) | 0.0288 (17) | 0.0037 (11)  | 0.0067 (12)  | 0.0110 (12)  |
| O <sup>2</sup>  | 0.0186 (15) | 0.0159 (15) | 0.0307 (18) | 0.0088 (12)  | 0.0046 (13)  | 0.0028 (13)  |
| O <sup>3</sup>  | 0.0100 (13) | 0.0076 (12) | 0.0184 (14) | 0.0022 (10)  | 0.0075 (11)  | 0.0020 (11)  |
| O <sup>4</sup>  | 0.0123 (15) | 0.0245 (18) | 0.078 (3)   | 0.0020 (13)  | 0.0184 (17)  | 0.0208 (19)  |
| O <sup>5</sup>  | 0.0129 (13) | 0.0150 (14) | 0.0119 (13) | 0.0020 (11)  | 0.0012 (11)  | 0.0046 (11)  |
| O <sup>6</sup>  | 0.0339 (19) | 0.0209 (16) | 0.0258 (18) | 0.0047 (14)  | 0.0160 (15)  | 0.0077 (14)  |
| O <sup>7</sup>  | 0.0154 (13) | 0.0090 (13) | 0.0109 (13) | -0.0006 (10) | 0.0003 (11)  | 0.0056 (10)  |
| O <sup>8</sup>  | 0.0163 (14) | 0.0136 (14) | 0.0256 (16) | 0.0077 (11)  | 0.0046 (12)  | 0.0099 (12)  |
| O <sup>9</sup>  | 0.0095 (13) | 0.0170 (14) | 0.0241 (16) | 0.0002 (11)  | 0.0046 (12)  | 0.0039 (12)  |
| O <sup>10</sup> | 0.0120 (13) | 0.0116 (13) | 0.0208 (15) | 0.0021 (10)  | 0.0041 (11)  | 0.0055 (11)  |
| O <sup>11</sup> | 0.0176 (14) | 0.0053 (12) | 0.0247 (16) | 0.0014 (10)  | 0.0079 (12)  | 0.0088 (11)  |
| O <sup>12</sup> | 0.047 (2)   | 0.0151 (15) | 0.0100 (14) | 0.0041 (14)  | 0.0051 (14)  | 0.0043 (12)  |
| O <sup>13</sup> | 0.0132 (13) | 0.0081 (12) | 0.0178 (14) | -0.0002 (10) | 0.0061 (11)  | 0.0067 (11)  |
| O <sup>14</sup> | 0.0097 (14) | 0.0161 (15) | 0.0388 (19) | 0.0065 (11)  | 0.0119 (13)  | 0.0113 (13)  |
| O <sup>15</sup> | 0.0064 (13) | 0.0144 (14) | 0.0332 (17) | -0.0012 (10) | 0.0071 (12)  | 0.0088 (13)  |
| O <sup>16</sup> | 0.0280 (18) | 0.0253 (17) | 0.0154 (16) | -0.0006 (14) | -0.0009 (13) | 0.0033 (13)  |
| O <sup>17</sup> | 0.0221 (15) | 0.0148 (14) | 0.0130 (14) | 0.0012 (12)  | 0.0074 (12)  | 0.0024 (11)  |
| O <sup>18</sup> | 0.0180 (14) | 0.0109 (13) | 0.0145 (14) | 0.0033 (11)  | -0.0029 (11) | 0.0076 (11)  |
| O <sup>19</sup> | 0.0176 (14) | 0.0104 (13) | 0.0210 (15) | 0.0065 (11)  | 0.0036 (12)  | 0.0059 (12)  |
| O <sup>20</sup> | 0.0165 (15) | 0.0123 (14) | 0.048 (2)   | -0.0005 (12) | 0.0111 (15)  | 0.0112 (14)  |
| O <sup>21</sup> | 0.0072 (13) | 0.0168 (14) | 0.0177 (14) | -0.0028 (10) | 0.0069 (11)  | 0.0026 (11)  |
| O <sup>22</sup> | 0.0287 (18) | 0.0178 (16) | 0.0260 (18) | -0.0019 (13) | 0.0050 (14)  | -0.0020 (13) |
| O <sup>23</sup> | 0.041 (2)   | 0.038 (2)   | 0.0142 (16) | 0.0175 (17)  | 0.0088 (15)  | 0.0111 (15)  |
| O <sup>24</sup> | 0.0155 (13) | 0.0070 (12) | 0.0128 (13) | 0.0019 (10)  | 0.0083 (11)  | 0.0039 (10)  |
| O <sup>25</sup> | 0.0146 (13) | 0.0089 (12) | 0.0114 (13) | 0.0008 (10)  | 0.0031 (11)  | 0.0045 (10)  |
| O <sup>26</sup> | 0.0086 (13) | 0.0207 (15) | 0.0314 (18) | 0.0058 (11)  | 0.0084 (12)  | 0.0099 (13)  |
| O <sup>27</sup> | 0.0083 (13) | 0.0161 (15) | 0.042 (2)   | 0.0066 (11)  | 0.0057 (13)  | 0.0047 (14)  |
| O <sup>28</sup> | 0.0239 (16) | 0.0167 (15) | 0.0108 (14) | 0.0004 (12)  | -0.0014 (12) | 0.0050 (12)  |
| O <sup>29</sup> | 0.0146 (13) | 0.0117 (13) | 0.0135 (14) | 0.0015 (11)  | 0.0013 (11)  | 0.0053 (11)  |
| O <sup>30</sup> | 0.0105 (13) | 0.0087 (13) | 0.0195 (15) | 0.0003 (10)  | 0.0054 (11)  | 0.0011 (11)  |
| O <sup>31</sup> | 0.0183 (16) | 0.0097 (15) | 0.073 (3)   | -0.0009 (12) | 0.0160 (17)  | 0.0170 (17)  |
| O <sup>32</sup> | 0.0236 (15) | 0.0109 (13) | 0.0135 (14) | -0.0037 (11) | 0.0029 (12)  | 0.0049 (11)  |
| O <sup>33</sup> | 0.048 (2)   | 0.0163 (16) | 0.0272 (19) | -0.0041 (15) | -0.0149 (16) | 0.0083 (14)  |
| O <sup>34</sup> | 0.0115 (13) | 0.0111 (13) | 0.0141 (14) | 0.0029 (10)  | -0.0001 (11) | 0.0052 (11)  |
| O <sup>35</sup> | 0.0324 (19) | 0.0343 (19) | 0.0276 (19) | 0.0111 (15)  | 0.0099 (15)  | 0.0218 (16)  |
| O <sup>36</sup> | 0.044 (2)   | 0.0278 (19) | 0.0182 (17) | 0.0075 (16)  | 0.0031 (16)  | -0.0009 (14) |

|                 |             |             |             |              |              |              |
|-----------------|-------------|-------------|-------------|--------------|--------------|--------------|
| O <sup>37</sup> | 0.0106 (14) | 0.0212 (16) | 0.0371 (19) | -0.0008 (12) | 0.0080 (13)  | 0.0156 (14)  |
| O <sup>38</sup> | 0.0165 (14) | 0.0095 (13) | 0.0265 (17) | -0.0033 (11) | 0.0063 (12)  | 0.0075 (12)  |
| O <sup>39</sup> | 0.035 (2)   | 0.0275 (18) | 0.0147 (16) | 0.0089 (15)  | -0.0033 (14) | 0.0045 (14)  |
| K <sup>6</sup>  | 0.123 (3)   | 0.0406 (15) | 0.082 (2)   | -0.0152 (17) | 0.088 (2)    | -0.0064 (16) |
| K <sup>7</sup>  | 0.0188 (16) | 0.0136 (15) | 0.0122 (14) | -0.0111 (12) | -0.0086 (12) | 0.0027 (12)  |
| K <sup>8</sup>  | 0.0503 (11) | 0.0786 (15) | 0.0301 (9)  | 0.0418 (11)  | 0.0074 (8)   | 0.0143 (9)   |
| K <sup>9</sup>  | 0.126 (4)   | 0.128 (4)   | 0.151 (4)   | -0.099 (3)   | -0.118 (3)   | 0.109 (4)    |
| K <sup>10</sup> | 0.121 (6)   | 0.019 (2)   | 0.034 (3)   | -0.024 (3)   | 0.050 (3)    | 0.000 (2)    |
| K <sup>11</sup> | 0.0597 (12) | 0.0755 (14) | 0.0351 (10) | 0.0403 (11)  | 0.0177 (9)   | 0.0162 (9)   |
| K <sup>12</sup> | 0.0002 (12) | 0.0124 (14) | 0.0062 (13) | -0.0073 (10) | 0.0006 (10)  | -0.0047 (11) |

Table S3. Geometric parameters (Å) of the average structure of K<sub>8</sub>Nb<sub>7</sub>P<sub>7</sub>O<sub>39</sub>.

|                                    |           |                                    |           |
|------------------------------------|-----------|------------------------------------|-----------|
| Nb <sup>1</sup> —O <sup>5</sup>    | 1.767 (3) | P <sup>6</sup> —O <sup>37</sup>    | 1.544 (3) |
| Nb <sup>1</sup> —O <sup>7</sup>    | 2.144 (3) | P <sup>7</sup> —O <sup>3</sup>     | 1.555 (3) |
| Nb <sup>1</sup> —O <sup>9</sup>    | 2.005 (3) | P <sup>7</sup> —O <sup>13</sup>    | 1.542 (3) |
| Nb <sup>1</sup> —O <sup>21</sup>   | 2.031 (3) | P <sup>7</sup> —O <sup>29</sup>    | 1.549 (3) |
| Nb <sup>1</sup> —O <sup>25</sup>   | 1.917 (3) | P <sup>7</sup> —O <sup>30</sup>    | 1.519 (3) |
| Nb <sup>1</sup> —O <sup>29</sup>   | 2.076 (3) | K <sup>1</sup> —O <sup>1ix</sup>   | 2.737 (4) |
| Nb <sup>2</sup> —O <sup>12ii</sup> | 2.267 (3) | K <sup>1</sup> —O <sup>3</sup>     | 3.028 (3) |
| Nb <sup>2</sup> —O <sup>14</sup>   | 1.914 (3) | K <sup>1</sup> —O <sup>5</sup>     | 3.340 (3) |
| Nb <sup>2</sup> —O <sup>20</sup>   | 2.002 (3) | K <sup>1</sup> —O <sup>9</sup>     | 3.276 (3) |
| Nb <sup>2</sup> —O <sup>26</sup>   | 2.056 (3) | K <sup>1</sup> —O <sup>10</sup>    | 2.727 (3) |
| Nb <sup>2</sup> —O <sup>38</sup>   | 2.028 (3) | K <sup>1</sup> —O <sup>11ix</sup>  | 2.873 (3) |
| Nb <sup>2</sup> —O <sup>39</sup>   | 1.728 (3) | K <sup>1</sup> —O <sup>15</sup>    | 3.224 (3) |
| Nb <sup>3</sup> —O <sup>5</sup>    | 2.374 (3) | K <sup>1</sup> —O <sup>17ix</sup>  | 3.118 (3) |
| Nb <sup>3</sup> —O <sup>8</sup>    | 2.010 (3) | K <sup>1</sup> —O <sup>24ix</sup>  | 3.180 (3) |
| Nb <sup>3</sup> —O <sup>10</sup>   | 2.044 (3) | K <sup>1</sup> —O <sup>27</sup>    | 2.742 (3) |
| Nb <sup>3</sup> —O <sup>15</sup>   | 1.900 (3) | K <sup>1</sup> —O <sup>29</sup>    | 2.898 (3) |
| Nb <sup>3</sup> —O <sup>16</sup>   | 1.720 (3) | K <sup>1</sup> —O <sup>34ix</sup>  | 2.710 (2) |
| Nb <sup>3</sup> —O <sup>37</sup>   | 2.047 (3) | K <sup>2</sup> —O <sup>6ix</sup>   | 2.684 (4) |
| Nb <sup>4</sup> —O <sup>1iii</sup> | 2.010 (3) | K <sup>2</sup> —O <sup>16ix</sup>  | 2.975 (3) |
| Nb <sup>4</sup> —O <sup>4</sup>    | 2.040 (3) | K <sup>2</sup> —O <sup>22x</sup>   | 2.726 (3) |
| Nb <sup>4</sup> —O <sup>15i</sup>  | 1.932 (3) | K <sup>2</sup> —O <sup>23xi</sup>  | 3.017 (4) |
| Nb <sup>4</sup> —O <sup>19</sup>   | 2.035 (3) | K <sup>2</sup> —O <sup>33ix</sup>  | 2.704 (3) |
| Nb <sup>4</sup> —O <sup>23</sup>   | 1.733 (3) | K <sup>2</sup> —O <sup>35x</sup>   | 2.680 (4) |
| Nb <sup>4</sup> —O <sup>28iv</sup> | 2.223 (3) | K <sup>2</sup> —O <sup>36xii</sup> | 3.224 (4) |
| Nb <sup>5</sup> —O <sup>11</sup>   | 2.028 (3) | K <sup>2</sup> —O <sup>39x</sup>   | 3.335 (4) |
| Nb <sup>5</sup> —O <sup>14</sup>   | 1.909 (3) | K <sup>3</sup> —O <sup>5i</sup>    | 3.326 (3) |
| Nb <sup>5</sup> —O <sup>17</sup>   | 2.314 (3) | K <sup>3</sup> —O <sup>8i</sup>    | 2.803 (3) |
| Nb <sup>5</sup> —O <sup>27v</sup>  | 2.057 (3) | K <sup>3</sup> —O <sup>9i</sup>    | 3.177 (3) |
| Nb <sup>5</sup> —O <sup>31</sup>   | 2.014 (3) | K <sup>3</sup> —O <sup>12ii</sup>  | 3.344 (3) |
| Nb <sup>5</sup> —O <sup>36</sup>   | 1.729 (3) | K <sup>3</sup> —O <sup>15i</sup>   | 3.274 (3) |
| Nb <sup>6</sup> —O <sup>18</sup>   | 2.018 (3) | K <sup>3</sup> —O <sup>18ii</sup>  | 2.932 (3) |

|                                    |           |                                         |                  |
|------------------------------------|-----------|-----------------------------------------|------------------|
| Nb <sup>6</sup> —O <sup>21</sup>   | 1.829 (3) | K <sup>3</sup> —O <sup>19</sup>         | 2.786 (3)        |
| Nb <sup>6</sup> —O <sup>24</sup>   | 1.944 (2) | K <sup>3</sup> —O <sup>25i</sup>        | 2.796 (3)        |
| Nb <sup>6</sup> —O <sup>25vi</sup> | 1.960 (2) | K <sup>3</sup> —O <sup>26</sup>         | 2.853 (4)        |
| Nb <sup>6</sup> —O <sup>30v</sup>  | 2.281 (3) | K <sup>3</sup> —O <sup>28iv</sup>       | 3.099 (3)        |
| Nb <sup>6</sup> —O <sup>34</sup>   | 1.990 (3) | K <sup>3</sup> —O <sup>30iv</sup>       | 2.975 (3)        |
| Nb <sup>7</sup> —O <sup>2</sup>    | 1.991 (3) | K <sup>3</sup> —O <sup>38</sup>         | 3.064 (3)        |
| Nb <sup>7</sup> —O <sup>3v</sup>   | 1.995 (3) | K <sup>4</sup> —O <sup>2</sup>          | 3.248 (4)        |
| Nb <sup>7</sup> —O <sup>13ii</sup> | 2.111 (3) | K <sup>4</sup> —O <sup>5</sup>          | 3.018 (3)        |
| Nb <sup>7</sup> —O <sup>17</sup>   | 1.769 (3) | K <sup>4</sup> —O <sup>10</sup>         | 3.007 (3)        |
| Nb <sup>7</sup> —O <sup>24</sup>   | 1.943 (3) | K <sup>4</sup> —O <sup>11</sup>         | 2.983 (3)        |
| Nb <sup>7</sup> —O <sup>32</sup>   | 2.176 (3) | K <sup>4</sup> —O <sup>12ii</sup>       | 2.996 (3)        |
| P <sup>1</sup> —O <sup>19</sup>    | 1.547 (3) | K <sup>4</sup> —O <sup>14</sup>         | 3.342 (3)        |
| P <sup>1</sup> —O <sup>26</sup>    | 1.536 (3) | K <sup>4</sup> —O <sup>20</sup>         | 2.893 (3)        |
| P <sup>1</sup> —O <sup>31ix</sup>  | 1.537 (3) | K <sup>4</sup> —O <sup>21</sup>         | 3.137 (3)        |
| P <sup>1</sup> —O <sup>35</sup>    | 1.479 (3) | K <sup>4</sup> —O <sup>24</sup>         | 2.853 (3)        |
| P <sup>2</sup> —O <sup>4xiii</sup> | 1.537 (4) | K <sup>4</sup> —O <sup>29</sup>         | 3.228 (3)        |
| P <sup>2</sup> —O <sup>8</sup>     | 1.556 (3) | K <sup>4</sup> —O <sup>37</sup>         | 2.782 (4)        |
| P <sup>2</sup> —O <sup>33</sup>    | 1.480 (4) | K <sup>5</sup> —O <sup>2ix</sup>        | 3.014 (3)        |
| P <sup>2</sup> —O <sup>38xi</sup>  | 1.561 (3) | K <sup>5</sup> —O <sup>4</sup>          | 2.805 (4)        |
| P <sup>3</sup> —O <sup>7</sup>     | 1.518 (2) | K <sup>5</sup> —O <sup>7iv</sup>        | 2.972 (3)        |
| P <sup>3</sup> —O <sup>9viii</sup> | 1.531 (3) | K <sup>5</sup> —O <sup>13iv</sup>       | 2.838 (3)        |
| P <sup>3</sup> —O <sup>28</sup>    | 1.505 (3) | K <sup>5</sup> —O <sup>17ix</sup>       | 3.320 (3)        |
| P <sup>3</sup> —O <sup>34vi</sup>  | 1.560 (3) | K <sup>5</sup> —O <sup>18iv</sup>       | 3.077 (3)        |
| P <sup>4</sup> —O <sup>10</sup>    | 1.551 (3) | K <sup>5</sup> —O <sup>19</sup>         | 3.210 (3)        |
| P <sup>4</sup> —O <sup>20</sup>    | 1.554 (4) | K <sup>5</sup> —O <sup>28iv</sup>       | 2.808 (3)        |
| P <sup>4</sup> —O <sup>22</sup>    | 1.481 (4) | K <sup>5</sup> —O <sup>31ix</sup>       | 3.101 (4)        |
| P <sup>4</sup> —O <sup>27</sup>    | 1.549 (3) | K <sup>5</sup> —O <sup>38ix</sup>       | 2.860 (3)        |
| P <sup>5</sup> —O <sup>2ii</sup>   | 1.530 (3) | <u>K<sup>6</sup>—K<sup>7</sup></u>      | <u>1.900 (3)</u> |
| P <sup>5</sup> —O <sup>12</sup>    | 1.506 (3) | <u>K<sup>6</sup>—K<sup>7xi</sup></u>    | <u>1.900 (3)</u> |
| P <sup>5</sup> —O <sup>18</sup>    | 1.557 (3) | <u>K<sup>7</sup>—K<sup>8xii</sup></u>   | <u>2.131 (4)</u> |
| P <sup>5</sup> —O <sup>32</sup>    | 1.517 (3) | <u>K<sup>9</sup>—K<sup>10</sup></u>     | <u>1.929 (7)</u> |
| P <sup>6</sup> —O <sup>1</sup>     | 1.561 (3) | <u>K<sup>9</sup>—K<sup>10xiii</sup></u> | <u>1.929 (7)</u> |
| P <sup>6</sup> —O <sup>6</sup>     | 1.479 (3) | <u>K<sup>10</sup>—K<sup>11</sup></u>    | <u>1.979 (7)</u> |
| P <sup>6</sup> —O <sup>11</sup>    | 1.560 (3) |                                         |                  |

Symmetry codes: (i)  $-x+2, -y+1, -z$ ; (ii)  $x-1, y+1, z$ ; (iii)  $x, y+1, z$ ; (iv)  $-x+1, -y+1, -z$ ; (v)  $x+1, y, z$ ; (vi)  $-x+2, -y, -z$ ; (vii)  $x-1, y, z$ ; (viii)  $x+1, y-1, z$ ; (ix)  $x, y-1, z$ ; (x)  $-x+1, -y, -z$ ; (xi)  $-x, -y, -z+1$ ; (xii)  $-x+1, -y, -z+1$ ; (xiii)  $-x+1, -y+1, -z+1$ ; (xiv)  $-x+2, -y+1, -z+1$ .

Table S4. Interatomic Distances (Å) of K—O bonds(including K<sup>6</sup>, K<sup>7</sup>, K<sup>8</sup>, K<sup>9</sup>, K<sup>10</sup>, K<sup>11</sup> and K<sup>12</sup> atoms) influenced by Strong Modulation in compound K<sub>8</sub>Nb<sub>7</sub>P<sub>7</sub>O<sub>39</sub>.

| distance                           | average  | minimum  | maximum  |
|------------------------------------|----------|----------|----------|
| K <sup>6</sup> -O <sup>33(i)</sup> | 2.437(5) | 2.552(6) | 2.557(7) |

|                                        |           |           |           |
|----------------------------------------|-----------|-----------|-----------|
| K <sup>6</sup> -O <sup>33</sup> (v)    | 2.437(5)  | 2.250(6)  | 2.552(6)  |
| K <sup>6</sup> -O <sup>35</sup> (vi)   | 3.093(5)  | 2.916(5)  | 3.511(5)  |
| K <sup>6</sup> -O <sup>35</sup> (ii)   | 3.096(5)  | 2.916(5)  | 3.509(5)  |
| K <sup>6</sup> -O <sup>39</sup> (vi)   | 2.747(4)  | 2.715(5)  | 2.794(5)  |
| K <sup>6</sup> -O <sup>39</sup> (ii)   | 2.746(4)  | 2.715(5)  | 2.793(5)  |
| K <sup>7</sup> -O <sup>16</sup> (v)    | 3.118(9)  | 3.041(10) | 3.157(10) |
| K <sup>7</sup> -O <sup>23</sup> (ii)   | 2.927(8)  | 2.807(9)  | 3.010(9)  |
| K <sup>7</sup> -O <sup>33</sup> (i)    | 2.846(9)  | 2.788(10) | 2.935(10) |
| K <sup>7</sup> -O <sup>33</sup> (v)    | 2.917(8)  | 2.886(10) | 2.993(10) |
| K <sup>7</sup> -O <sup>35</sup> (ii)   | 2.640(7)  | 2.591(8)  | 2.656(8)  |
| K <sup>7</sup> -O <sup>39</sup> (vi)   | 2.605(6)  | 2.536(8)  | 2.641(8)  |
| K <sup>8</sup> -O <sup>23</sup> (iii)  | 2.686(5)  | 2.675(6)  | 2.721(6)  |
| K <sup>8</sup> -O <sup>31</sup> (iv)   | 3.361(5)  | 3.152(5)  | 3.506(5)  |
| K <sup>8</sup> -O <sup>33</sup> (vii)  | 2.777(5)  | 2.736(5)  | 2.878(5)  |
| K <sup>8</sup> -O <sup>35</sup> (iii)  | 2.801(4)  | 2.706(5)  | 3.059(5)  |
| K <sup>8</sup> -O <sup>35</sup> (ii)   | 2.744(5)  | 2.662(6)  | 2.978(6)  |
| K <sup>8</sup> -O <sup>36</sup> (iv)   | 3.036(5)  | 2.904(5)  | 3.230(5)  |
| K <sup>8</sup> -O <sup>39</sup> (iv)   | 3.033(5)  | 2.922(5)  | 3.369(5)  |
| K <sup>9</sup> -O <sup>6</sup> (i)     | 2.489(4)  | 2.367(5)  | 2.564(5)  |
| K <sup>9</sup> -O <sup>6</sup> (iv)    | 2.489(4)  | 2.368(5)  | 2.564(5)  |
| K <sup>9</sup> -O <sup>22</sup>        | 3.206(6)  | 2.953(7)  | 3.599(7)  |
| K <sup>9</sup> -O <sup>22</sup> (ii)   | 3.202(6)  | 2.952(7)  | 3.596(7)  |
| K <sup>9</sup> -O <sup>36</sup> (i)    | 2.734(6)  | 2.678(7)  | 2.826(7)  |
| K <sup>9</sup> -O <sup>36</sup> (iv)   | 2.734(6)  | 2.678(7)  | 2.823(7)  |
| K <sup>10</sup> -O <sup>6</sup> (i)    | 3.425(18) | 2.521(19) | 4.609(19) |
| K <sup>10</sup> -O <sup>6</sup> (iv)   | 2.751(12) | 2.693(13) | 2.842(13) |
| K <sup>10</sup> -O <sup>16</sup>       | 2.993(17) | 2.646(19) | 3.571(19) |
| K <sup>10</sup> -O <sup>22</sup>       | 2.683(17) | 2.607(19) | 2.837(19) |
| K <sup>10</sup> -O <sup>23</sup> (iii) | 3.128(14) | 2.910(15) | 3.616(15) |

|                                                                                                                                                                                                   |           |           |           |
|---------------------------------------------------------------------------------------------------------------------------------------------------------------------------------------------------|-----------|-----------|-----------|
| K <sup>10</sup> -O <sup>36</sup> (iv)                                                                                                                                                             | 2.663(18) | 2.631(19) | 2.771(19) |
| K <sup>11</sup> -O <sup>6</sup> (iv)                                                                                                                                                              | 2.734(5)  | 2.671(6)  | 2.797(6)  |
| K <sup>11</sup> -O <sup>16</sup>                                                                                                                                                                  | 2.707(5)  | 2.671(5)  | 2.738(5)  |
| K <sup>11</sup> -O <sup>20</sup> (iv)                                                                                                                                                             | 3.335(5)  | 3.224(6)  | 3.438(6)  |
| K <sup>11</sup> -O <sup>22</sup>                                                                                                                                                                  | 2.798(6)  | 2.731(6)  | 2.988(6)  |
| K <sup>11</sup> -O <sup>22</sup> (iv)                                                                                                                                                             | 2.720(5)  | 2.657(6)  | 2.916(6)  |
| K <sup>11</sup> -O <sup>36</sup> (iv)                                                                                                                                                             | 3.027(6)  | 2.877(7)  | 3.447(7)  |
| K <sup>11</sup> -O <sup>39</sup> (iv)                                                                                                                                                             | 3.007(6)  | 2.915(6)  | 3.202(6)  |
| K <sup>12</sup> -O <sup>3</sup> (vi)                                                                                                                                                              | 2.658(6)  | 2.616(7)  | 2.677(7)  |
| K <sup>12</sup> -O <sup>12</sup> (viii)                                                                                                                                                           | 2.498(7)  | 2.432(8)  | 2.533(8)  |
| K <sup>12</sup> -O <sup>13</sup> (ix)                                                                                                                                                             | 2.807(7)  | 2.745(8)  | 2.872(8)  |
| K <sup>12</sup> -O <sup>17</sup> (x)                                                                                                                                                              | 2.606(7)  | 2.554(8)  | 2.628(8)  |
| K <sup>12</sup> -O <sup>20</sup> (vi)                                                                                                                                                             | 3.079(7)  | 3.059(8)  | 3.130(8)  |
| K <sup>12</sup> -O <sup>26</sup> (vi)                                                                                                                                                             | 2.721(6)  | 2.690(7)  | 2.789(7)  |
| K <sup>12</sup> -O <sup>27</sup> (vi)                                                                                                                                                             | 2.825(8)  | 2.801(9)  | 2.891(9)  |
| K <sup>12</sup> -O <sup>31</sup> (x)                                                                                                                                                              | 3.020(7)  | 2.982(8)  | 3.103(8)  |
| K <sup>12</sup> -O <sup>32</sup> (viii)                                                                                                                                                           | 2.797(7)  | 2.716(8)  | 2.871(8)  |
| Symmetry codes: (i) x-1,y,z; (ii) -x+1,-y+1,-z+1; (iii) x,y-1,z; (iv) -x+2,-y+1,-z+1; (v) -x+1,-y,-z+1; (vi) x-1,y-1,z; (vii) -x+2,-y,-z+1; (viii) -x+1,-y,-z; (ix) -x,-y,-z; (x) x-2,y-1,z. x, y |           |           |           |

Table S5. Bond valence sums (BVS) influenced by structural modulation in compound

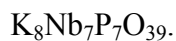

| Atoms           | Average   | Minimum  | Maximum  |
|-----------------|-----------|----------|----------|
| Nb <sup>1</sup> | 5.1218(4) | 5.075(7) | 5.163(7) |
| Nb <sup>2</sup> | 5.1965(7) | 5.081(7) | 5.269(7) |
| Nb <sup>3</sup> | 5.1406(7) | 5.119(7) | 5.161(7) |
| Nb <sup>4</sup> | 5.1156(7) | 5.090(7) | 5.142(7) |
| Nb <sup>5</sup> | 5.0977(7) | 5.033(7) | 5.152(7) |
| Nb <sup>6</sup> | 4.9558(4) | 4.905(7) | 5.012(7) |

|                 |             |          |          |
|-----------------|-------------|----------|----------|
| Nb <sup>7</sup> | 5.0595(4)   | 5.032(7) | 5.101(7) |
| K <sup>1</sup>  | 1.37368(2)  | 1.325(7) | 1.423(7) |
| K <sup>2</sup>  | 1.10501(3)  | 1.076(7) | 1.130(7) |
| K <sup>3</sup>  | 1.139674(1) | 1.083(7) | 1.191(7) |
| K <sup>4</sup>  | 1.024644(1) | 0.983(7) | 1.071(7) |
| K <sup>5</sup>  | 1.040286(1) | 1.007(7) | 1.081(7) |
| K <sup>6</sup>  | 1.38105(11) | 1.163(7) | 1.807(7) |
| K <sup>7</sup>  | 0.96013(7)  | 0.910(7) | 1.031(7) |
| K <sup>8</sup>  | 0.99011(3)  | 0.848(7) | 1.090(7) |
| K <sup>9</sup>  | 1.23032(6)  | 1.124(7) | 1.422(7) |
| K <sup>10</sup> | 0.9688(3)   | 0.884(7) | 1.106(7) |
| K <sup>11</sup> | 1.00621(3)  | 0.858(7) | 1.079(7) |
| K <sup>12</sup> | 1.68253(13) | 1.650(7) | 1.762(7) |
| P <sup>1</sup>  | 5.0870(7)   | 5.015(7) | 5.176(7) |
| P <sup>2</sup>  | 4.9886(9)   | 4.927(7) | 5.043(7) |
| P <sup>3</sup>  | 5.1019(7)   | 5.046(7) | 5.166(7) |
| P <sup>4</sup>  | 5.0418(9)   | 4.990(7) | 5.092(7) |
| P <sup>5</sup>  | 5.0870(7)   | 5.015(7) | 5.176(7) |
| P <sup>6</sup>  | 5.0079(9)   | 4.988(7) | 5.027(7) |
| P <sup>7</sup>  | 4.9077(6)   | 4.877(7) | 4.934(7) |

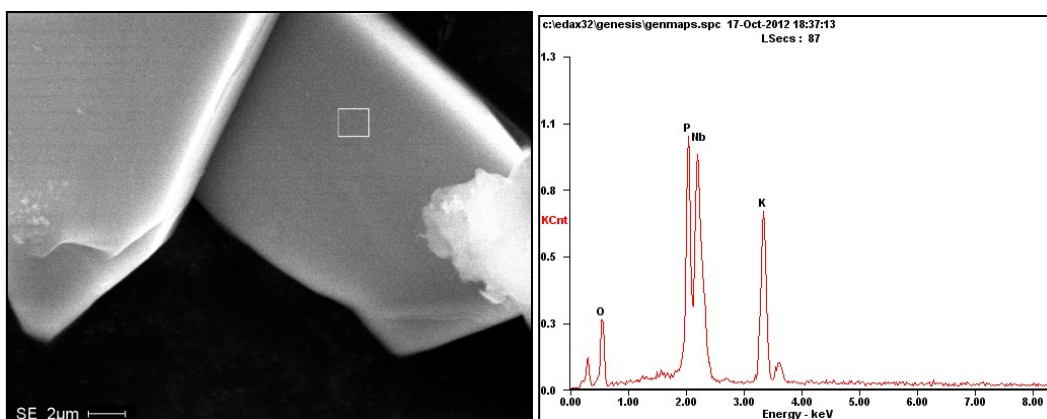

Figure S1. EDS analysis for compound  $K_8Nb_7P_7O_{39}$ .



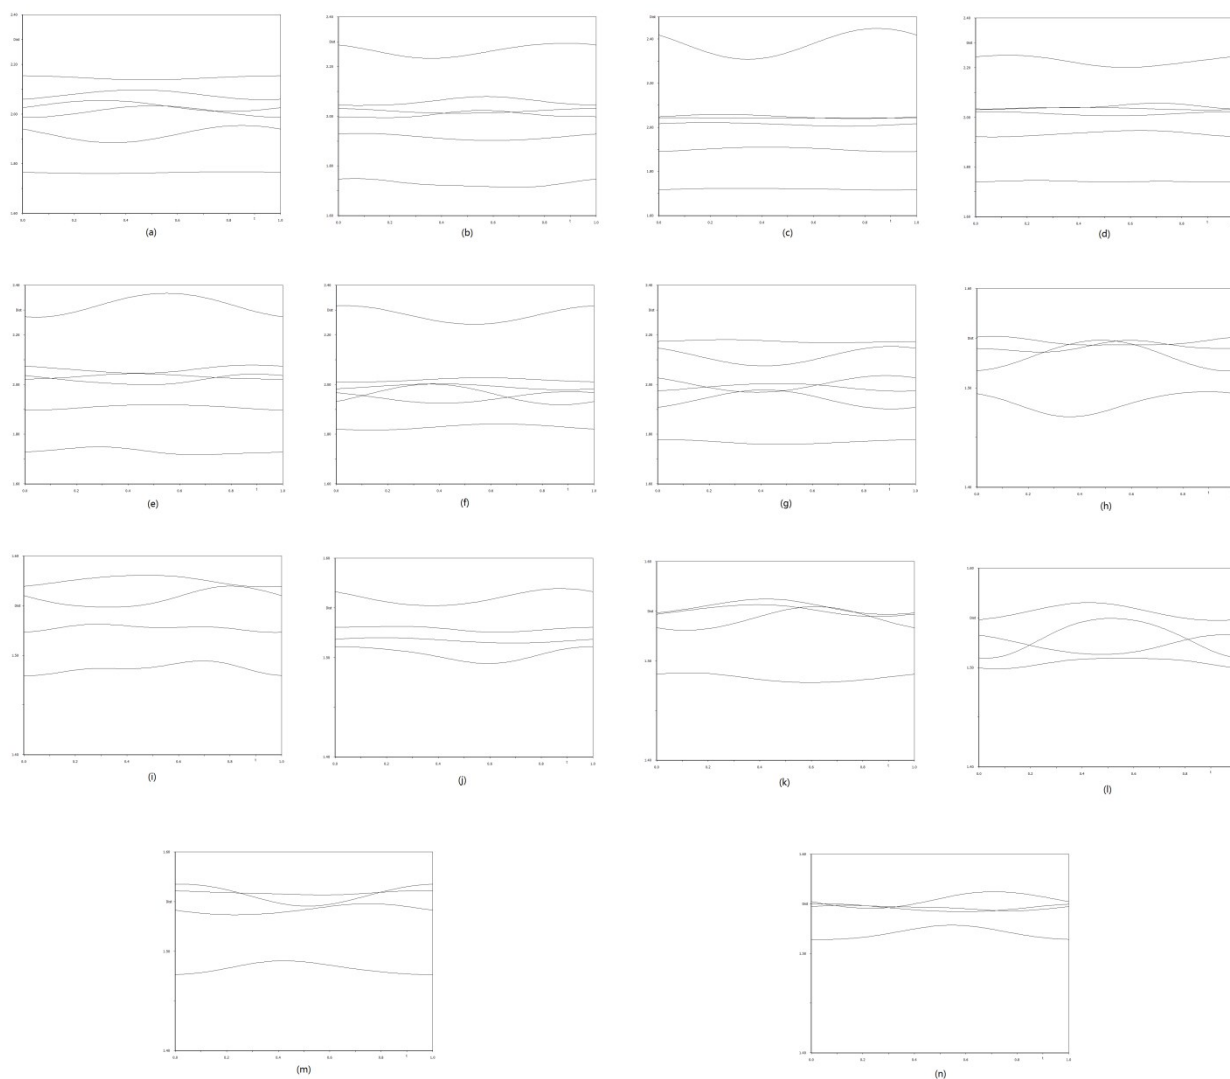

Figure S2. Evolution of Nb–O distances and P–O distances versus the internal parameter  $t$  for (a) Nb<sup>1</sup>, (b) Nb<sup>2</sup>, (c) Nb<sup>3</sup>, (d) Nb<sup>4</sup>, (e) Nb<sup>5</sup>, (f) Nb<sup>6</sup>, (g) Nb<sup>7</sup>, (h) P<sup>1</sup>, (i) P<sup>2</sup>, (j) P<sup>3</sup>, (k) P<sup>4</sup>, (l) P<sup>5</sup>, (m) P<sup>6</sup> and (n) P<sup>7</sup> atomic positions.

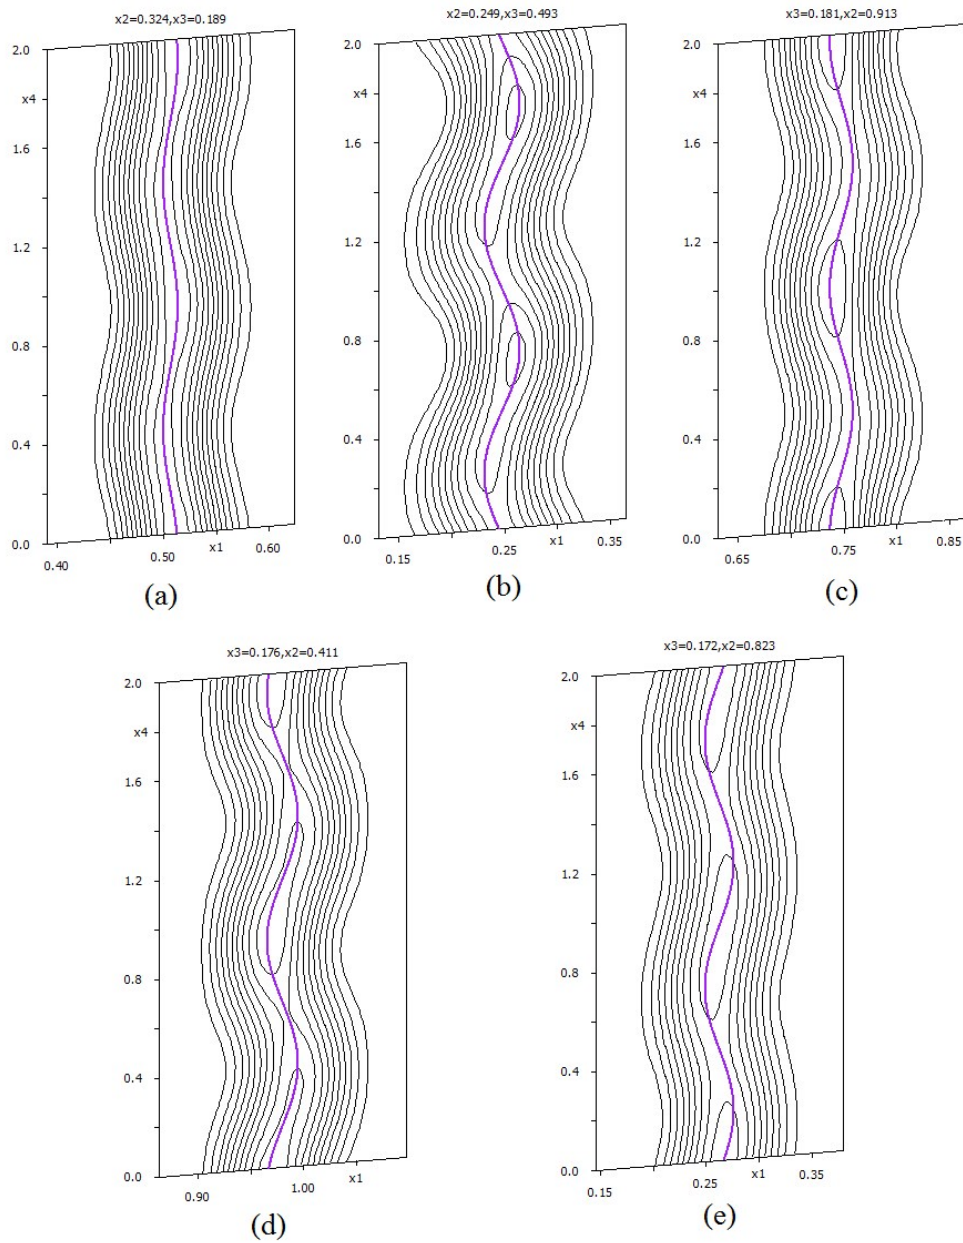

Figure S3.  $x_1$ - $x_4$  section through the superspace electron density at the position of the  $K^1$ (a),  $K^2$ (b),  $K^3$ (c),  $K^4$ (d) and  $K^5$ (e) atoms.

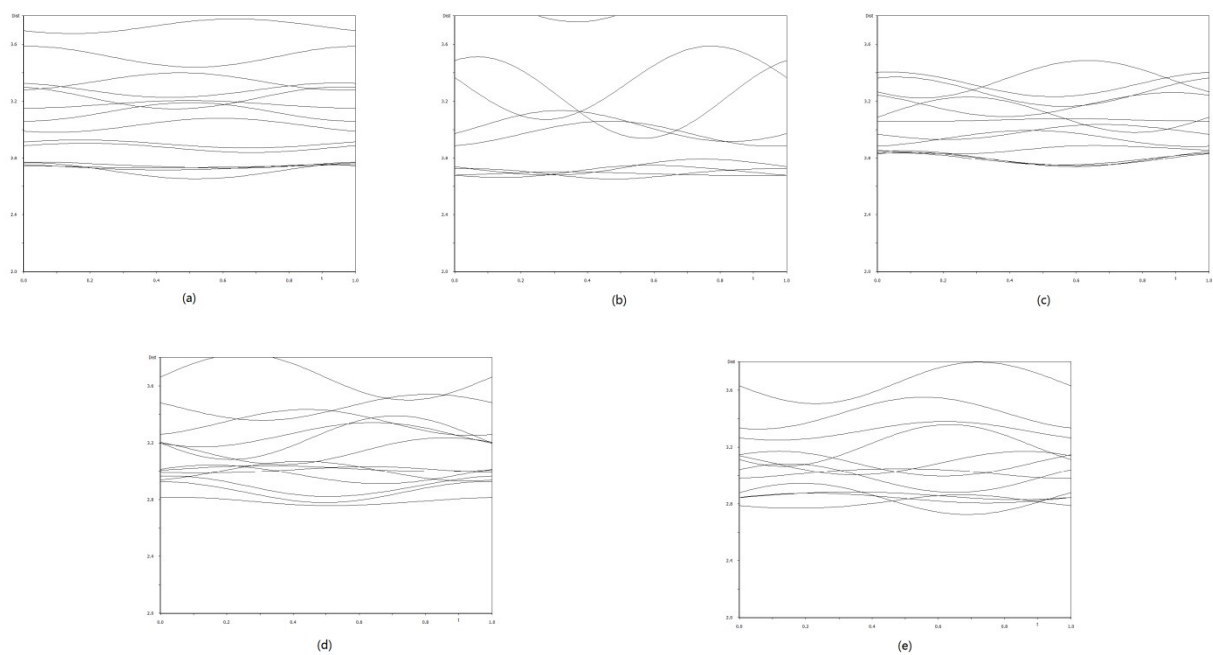

Figure S4. Evolution of K–O distances versus the internal parameter  $t$  for (a) K<sup>1</sup>, (b) K<sup>2</sup>, (c) K<sup>3</sup>, (d) K<sup>5</sup> and (e) K<sup>5</sup> atoms.
